# Supplementary material for: Functional heterometallic coordination polymers with metalloligands as tunable luminescent crystalline materials
Source: Royal Society of Chemistry journal article supplement (doi:10.1039/c2jm34661c), 2012-01-01
Supplement: c2jm34661c.pdf [file c2jm34661c.pdf]

## Supporting Information

### **Functional heterometallic coordination polymers with metalloligand as tunable luminescent crystalline materials**

Dong-Ying Du,<sup>a</sup> Jun-Sheng Qin,<sup>a</sup> Cheng-Xin Sun,<sup>b</sup> Xin-Long Wang,<sup>\*a</sup> Shu-Ran Zhang,<sup>a</sup> Ping Shen,<sup>a</sup> Shun-Li Li,<sup>a</sup> Zhong-Min Su<sup>\*a</sup> and Ya-Qian Lan<sup>\*a</sup>

<sup>a</sup> Institute of Functional Material Chemistry, Faculty of Chemistry, Northeast Normal University, Changchun 130024, P. R. China. Fax: (+86) 431-85684009. E-mail: [zmsu@nenu.edu.cn](mailto:zmsu@nenu.edu.cn); [lanyq176@nenu.edu.cn](mailto:lanyq176@nenu.edu.cn).

<sup>b</sup> School of Life Sciences, Northeast Normal University, Changchun 130024, P. R. China

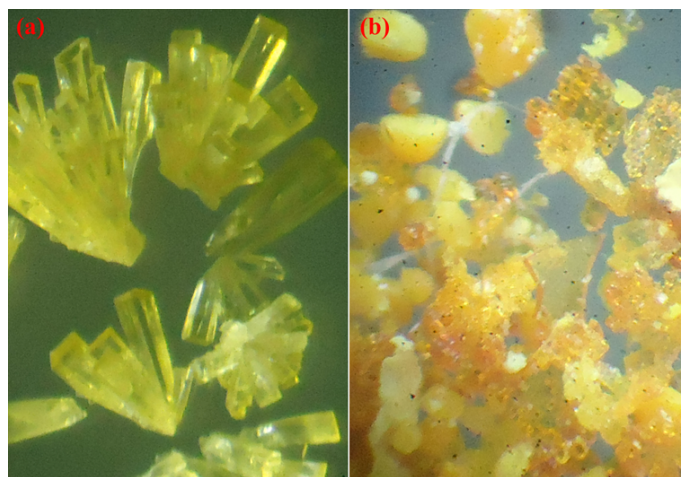

**Fig. S1** The images of (a) IFMC-23 and (b) no addition of BMIB.

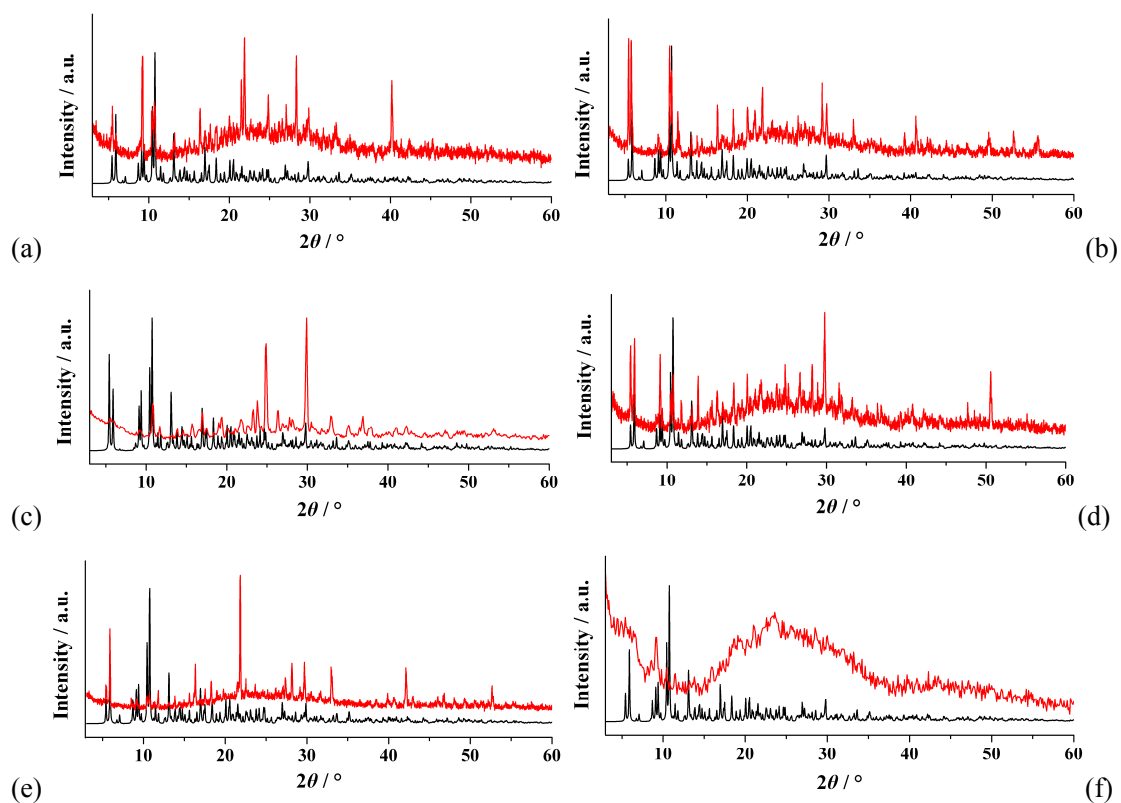

**Fig. S2** XRPD patterns (top, red) and simulated patterns (bottom, black) for (a) – (e) IFMC-21 to 25 and (f) no addition of BMIB, respectively.

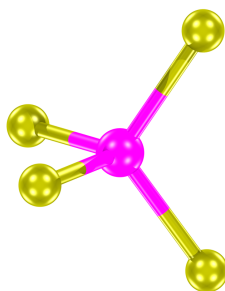

**Fig. S3**  $[\text{ZnBr}_4]^{2-}$  unit in IFMC-21.

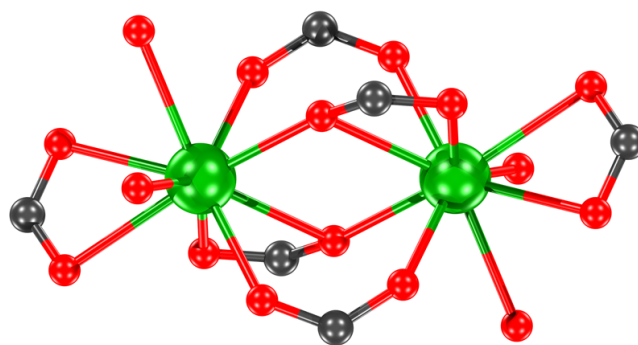

**Fig. S4** The coordination mode of the bimetallic unit  $[\text{Eu}_2(\text{COO})_2(\text{COO})_4(\text{H}_2\text{O})_4]$  in IFMC-21.

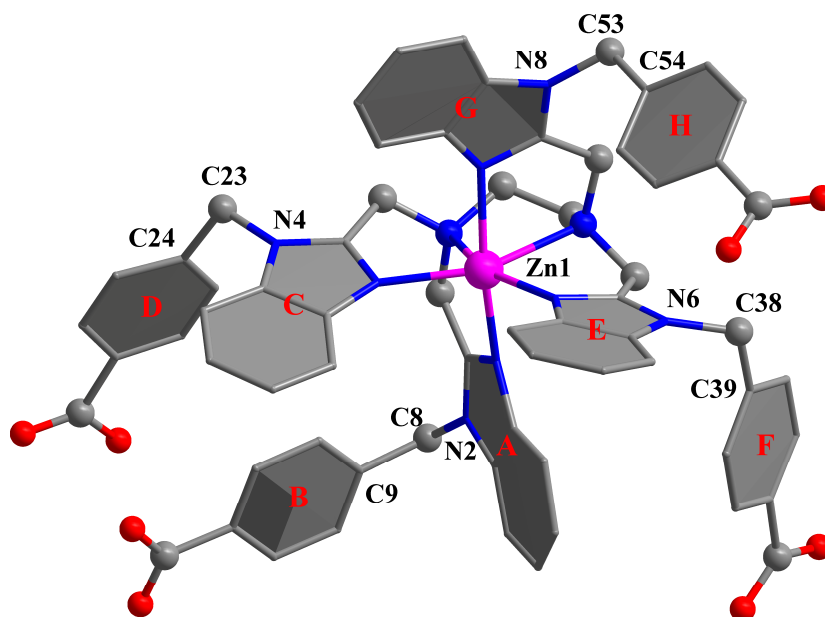

**Fig. S5** The binding mode of the carboxylate ligand to Zn(II) ion in IFMC-21.

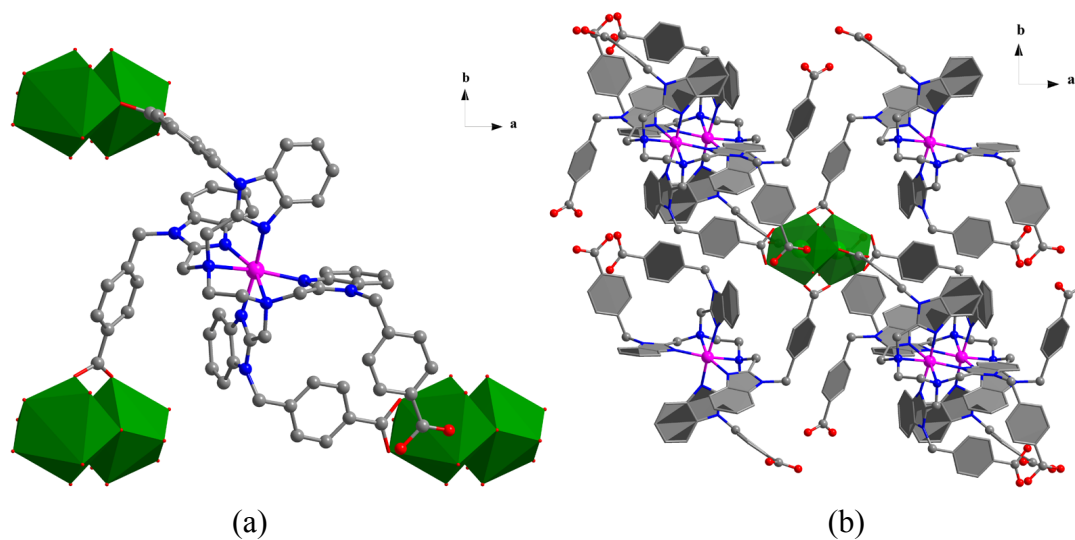

**Fig. S6** (a) The carboxylate ligand acts as three-connected node and (b) bimetallic unit works as six-connected node in IFMC-21, respectively.

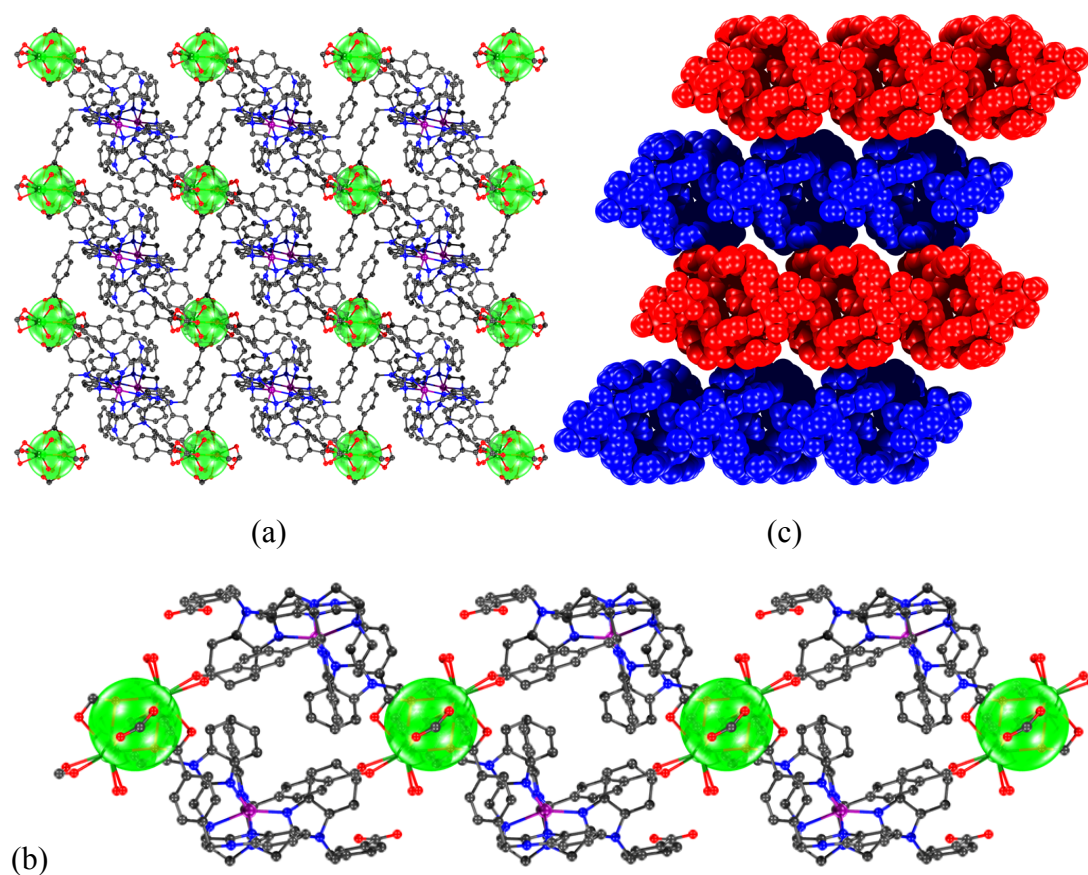

**Fig. S7** (a) and (b) Ball-and-stick representations of the 2D sheet-like structure of IFMC-21. (c) Spacefill representation of 3D supramolecular structure of IFMC-21.

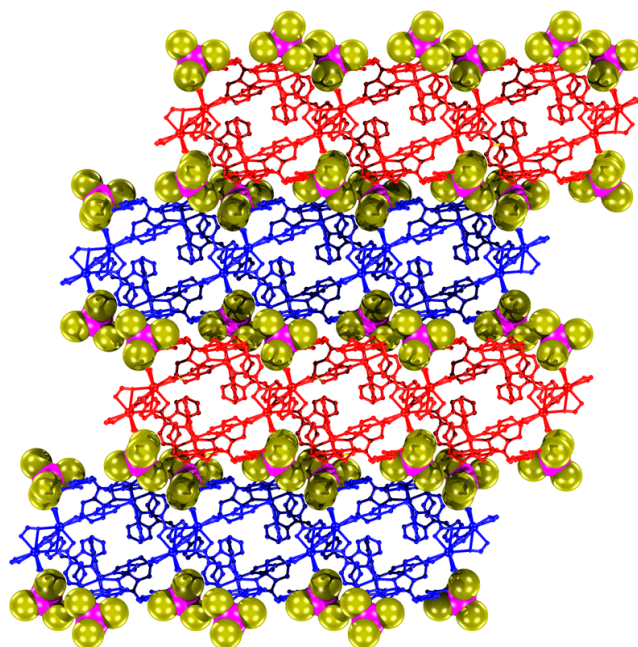

**Fig. S8** The packing arrangement of IFMC-21 in the *ac* plane, with isolated  $[\text{ZnBr}_4]^{2-}$  located in the interspaces of the 2D sheet-like structure.

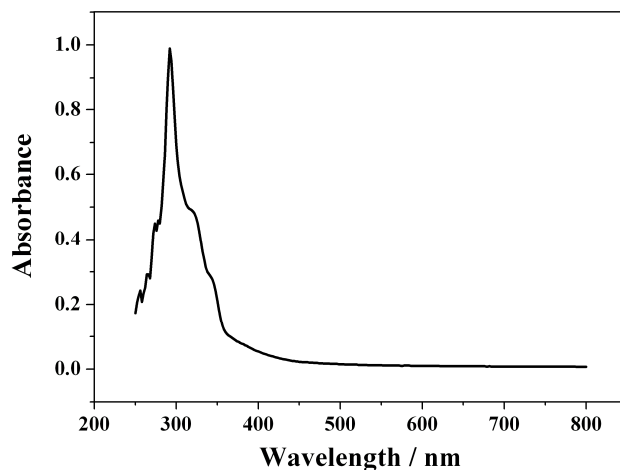

**Fig. S9** The UV absorption spectrum of ligand H<sub>4</sub>L.

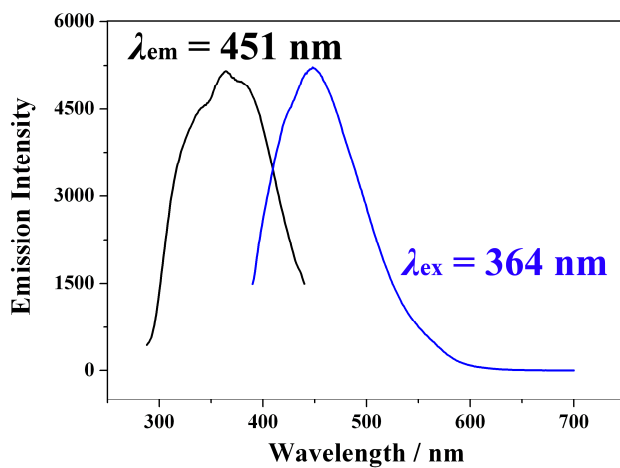

**Fig. S10** Excitation and emission spectra of H<sub>4</sub>L in the solid state at room temperature.

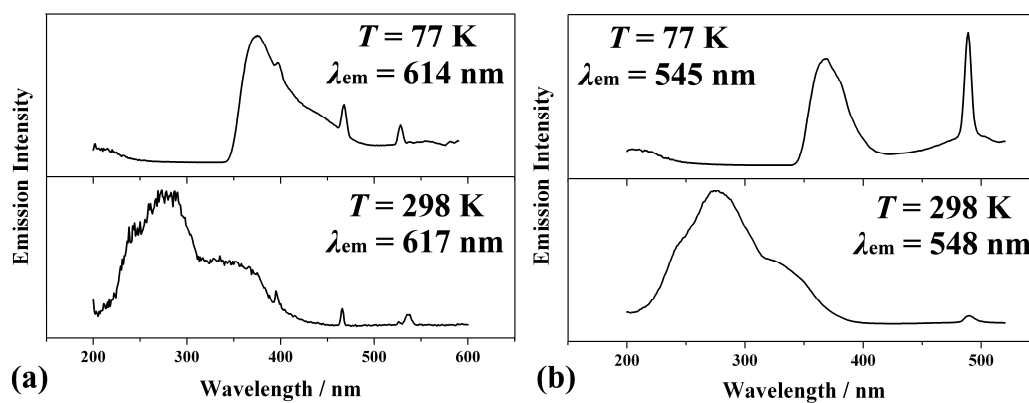

**Fig. S11** Excitation spectra of IFMC-21 (a) and IFMC-25 (b) in the solid state, respectively.

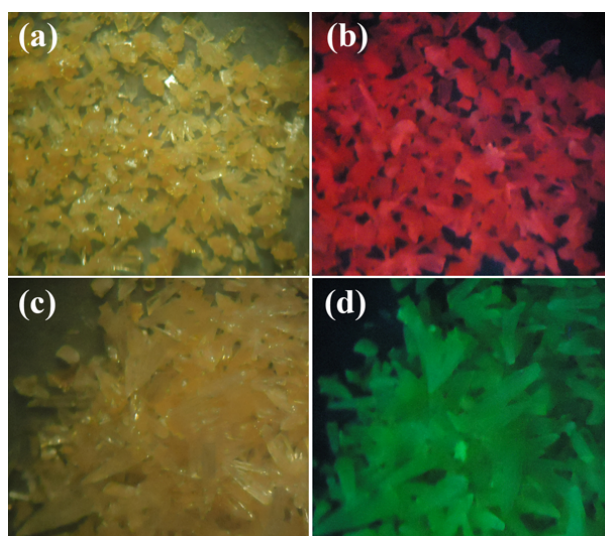

**Fig. S12** The photographs of IFMC-21 ((a) and (b)) and IFMC-25 ((c) and (d)). (a) and (c): under natural light; (b) and (d): under a UV lamp.

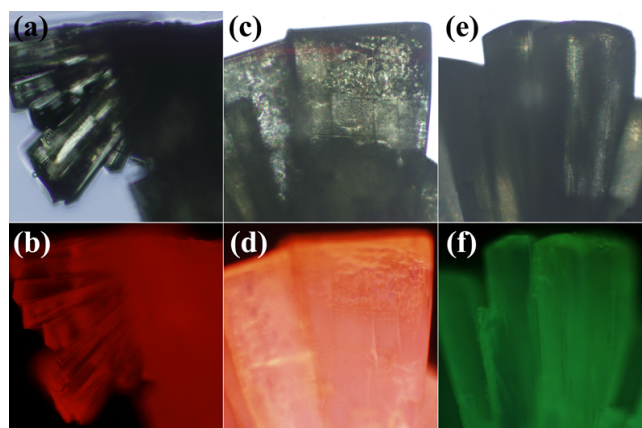

**Fig. S13** Fluorescence camera images of IFMC-21 (a, b), IFMC-23 (c, d) and IFMC-25 (e, f) under different light sources (a, c and e: under natural light; b, d and f: under UV light).

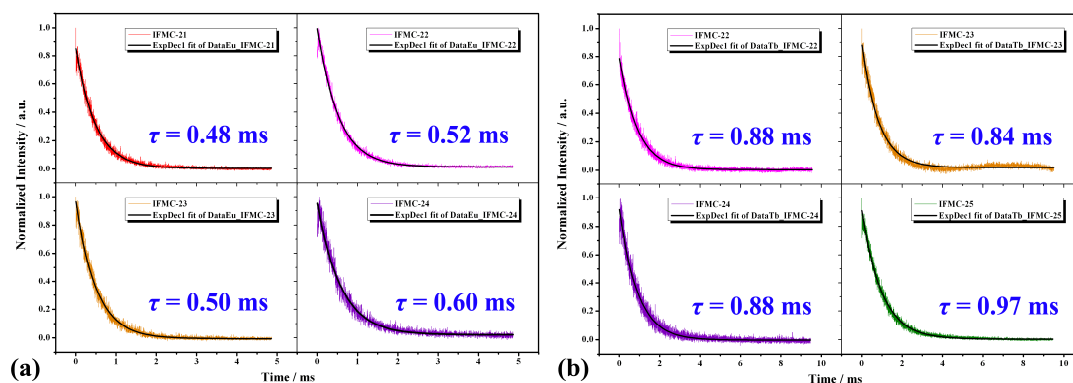

**Fig. S14** Solid state fluorescence decay curves of IFMC-21 – 25 (Monitor wavelengths: a, 617 nm and b, 545 nm).

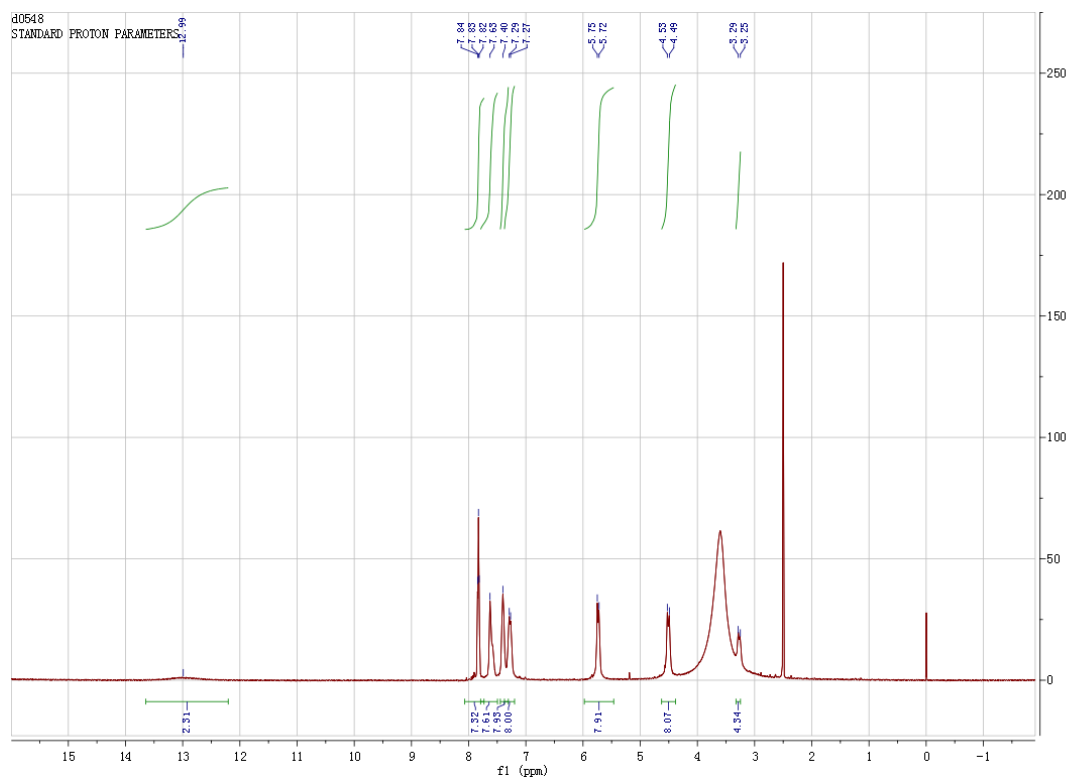

**Fig. S15** The  $^1\text{H}$  NMR spectrum of  $\text{H}_4\text{L}$ :  $^1\text{H}$  NMR (500 MHz,  $\text{DMSO-d}_6$ )  $\delta$  (TMS, ppm) 12.99 (s, 4H), 7.83 (t,  $J = 6.8$ , 8H), 7.63 (s, 8H), 7.40 (s, 8H), 7.28 (d,  $J = 11.4$ , 8H), 5.73 (d,  $J = 15.6$ , 8H), 4.51 (d,  $J = 17.7$ , 8H), 3.27 (d,  $J = 20.1$ , 4H).

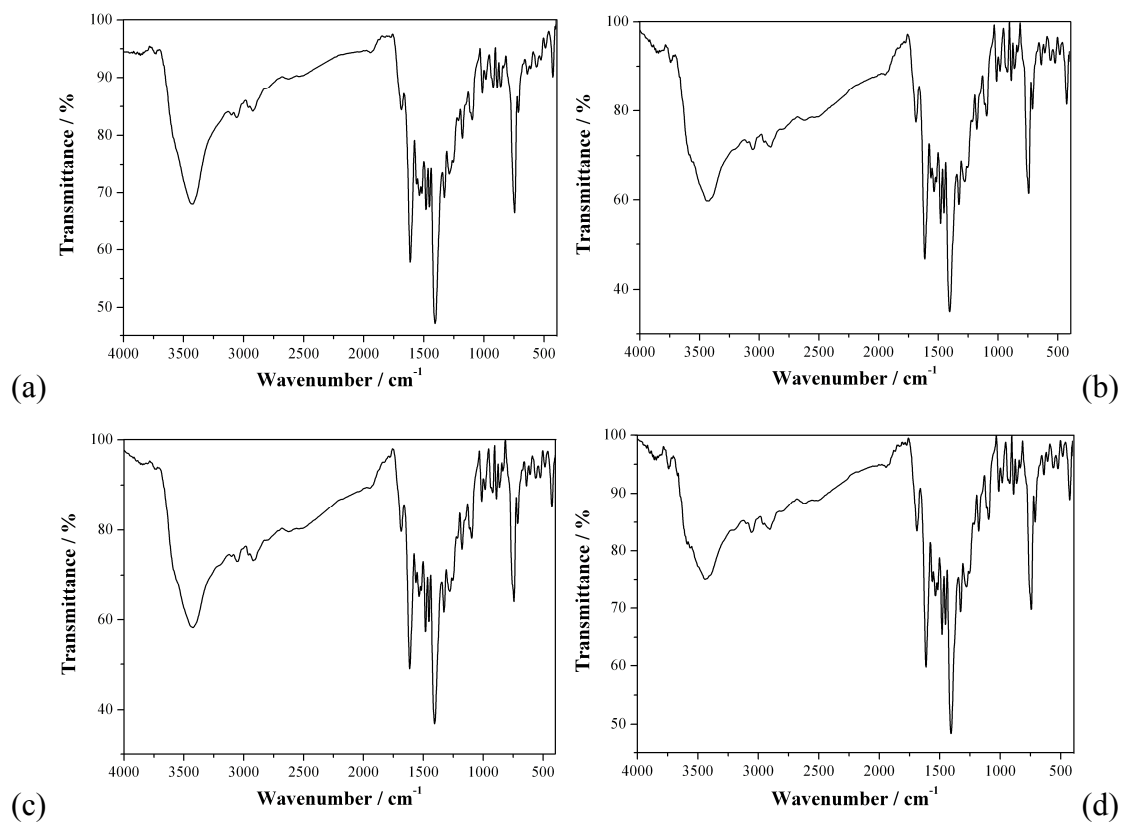

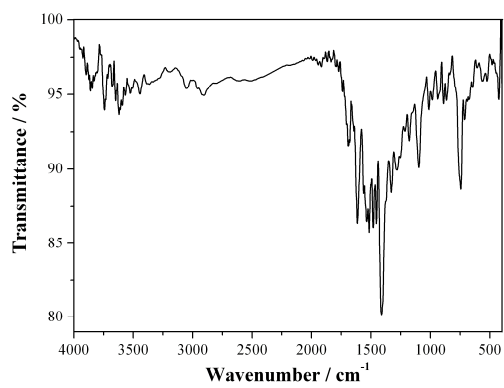

(e)

**Fig. S16** IR curves for **IFMC-21** to **25**.



**Table S1.** Crystal data and structure refinements for **IFMC-21** to **25**

|                                                | <b>IFMC-21</b>                                                                                                                        | <b>IFMC-22</b>                                                                                                                        | <b>IFMC-23</b>                                                                                                                      |
|------------------------------------------------|---------------------------------------------------------------------------------------------------------------------------------------|---------------------------------------------------------------------------------------------------------------------------------------|-------------------------------------------------------------------------------------------------------------------------------------|
| Empirical formula                              | C <sub>66</sub> H <sub>59</sub> N <sub>10</sub> O <sub>11</sub> Br <sub>4</sub> Zn <sub>2</sub> Eu                                    | C <sub>66</sub> H <sub>59</sub> N <sub>10</sub> O <sub>11</sub> Br <sub>4</sub> Zn <sub>2</sub> Eu <sub>0.75</sub> Tb <sub>0.25</sub> | C <sub>66</sub> H <sub>59</sub> N <sub>10</sub> O <sub>11</sub> Br <sub>4</sub> Zn <sub>2</sub> Eu <sub>0.5</sub> Tb <sub>0.5</sub> |
| <i>M</i> w                                     | 1770.57                                                                                                                               | 1772.31                                                                                                                               | 1774.05                                                                                                                             |
| Crystal system                                 | Monoclinic                                                                                                                            | Monoclinic                                                                                                                            | Monoclinic                                                                                                                          |
| Space group                                    | <i>P</i> 2 <sub>1</sub> / <i>n</i>                                                                                                    | <i>P</i> 2 <sub>1</sub> / <i>n</i>                                                                                                    | <i>P</i> 2 <sub>1</sub> / <i>n</i>                                                                                                  |
| <i>a</i> (Å)                                   | 15.6650(10)                                                                                                                           | 15.7550(12)                                                                                                                           | 15.6800(9)                                                                                                                          |
| <i>b</i> (Å)                                   | 13.5120(8)                                                                                                                            | 13.5370(10)                                                                                                                           | 13.5150(8)                                                                                                                          |
| <i>c</i> (Å)                                   | 33.082(2)                                                                                                                             | 33.101(3)                                                                                                                             | 33.051(2)                                                                                                                           |
| $\beta$ (deg)                                  | 99.9330(10)                                                                                                                           | 99.7820(10)                                                                                                                           | 99.786(8)                                                                                                                           |
| <i>V</i> (Å <sup>3</sup> )                     | 6897.4(7)                                                                                                                             | 6957.0(9)                                                                                                                             | 6902.1(7)                                                                                                                           |
| <i>Z</i>                                       | 4                                                                                                                                     | 4                                                                                                                                     | 4                                                                                                                                   |
| <i>D</i> <sub>c</sub> (Mg·m <sup>-3</sup> )    | 1.705                                                                                                                                 | 1.692                                                                                                                                 | 1.707                                                                                                                               |
| Abs.coeff. (mm <sup>-1</sup> )                 | 3.971                                                                                                                                 | 3.965                                                                                                                                 | 4.026                                                                                                                               |
| <i>F</i> (000)                                 | 3504                                                                                                                                  | 3506                                                                                                                                  | 3508                                                                                                                                |
| reflns collected                               | 34093                                                                                                                                 | 41097                                                                                                                                 | 39658                                                                                                                               |
| Independent reflns                             | 12212                                                                                                                                 | 15842                                                                                                                                 | 15047                                                                                                                               |
| $\theta$ range (deg)                           | 1.25 – 25.08                                                                                                                          | 1.25 – 27.73                                                                                                                          | 1.55 – 27.06                                                                                                                        |
| GOF on <i>F</i> <sup>2</sup>                   | 1.044                                                                                                                                 | 0.989                                                                                                                                 | 1.044                                                                                                                               |
| <i>R</i> <sub>int</sub>                        | 0.0556                                                                                                                                | 0.0478                                                                                                                                | 0.0477                                                                                                                              |
| <i>R</i> <sub>1</sub> <sup>a</sup>             | 0.0545                                                                                                                                | 0.0601                                                                                                                                | 0.0517                                                                                                                              |
| <i>wR</i> <sub>2</sub> (all data) <sup>b</sup> | 0.1744                                                                                                                                | 0.2174                                                                                                                                | 0.1638                                                                                                                              |
|                                                | <b>IFMC-24</b>                                                                                                                        | <b>IFMC-25</b>                                                                                                                        |                                                                                                                                     |
| Empirical formula                              | C <sub>66</sub> H <sub>59</sub> N <sub>10</sub> O <sub>11</sub> Br <sub>4</sub> Zn <sub>2</sub> Eu <sub>0.25</sub> Tb <sub>0.75</sub> | C <sub>66</sub> H <sub>59</sub> N <sub>10</sub> O <sub>11</sub> Br <sub>4</sub> Zn <sub>2</sub> Tb                                    |                                                                                                                                     |
| <i>M</i> w                                     | 1775.79                                                                                                                               | 1777.53                                                                                                                               |                                                                                                                                     |
| Crystal system                                 | Monoclinic                                                                                                                            | Monoclinic                                                                                                                            |                                                                                                                                     |
| Space group                                    | <i>P</i> 2 <sub>1</sub> / <i>n</i>                                                                                                    | <i>P</i> 2 <sub>1</sub> / <i>n</i>                                                                                                    |                                                                                                                                     |
| <i>a</i> (Å)                                   | 15.676(2)                                                                                                                             | 15.6340(8)                                                                                                                            |                                                                                                                                     |
| <i>b</i> (Å)                                   | 13.5140(17)                                                                                                                           | 13.4910(7)                                                                                                                            |                                                                                                                                     |
| <i>c</i> (Å)                                   | 33.055(4)                                                                                                                             | 33.0790(18)                                                                                                                           |                                                                                                                                     |
| $\beta$ (deg)                                  | 99.803(2)                                                                                                                             | 99.7480(10)                                                                                                                           |                                                                                                                                     |
| <i>V</i> (Å <sup>3</sup> )                     | 6900.3(15)                                                                                                                            | 6876.2(6)                                                                                                                             |                                                                                                                                     |
| <i>Z</i>                                       | 4                                                                                                                                     | 4                                                                                                                                     |                                                                                                                                     |
| <i>D</i> <sub>c</sub> (Mg·m <sup>-3</sup> )    | 1.709                                                                                                                                 | 1.717                                                                                                                                 |                                                                                                                                     |
| Abs.coeff. (mm <sup>-1</sup> )                 | 4.056                                                                                                                                 | 4.099                                                                                                                                 |                                                                                                                                     |
| <i>F</i> (000)                                 | 3510                                                                                                                                  | 3512                                                                                                                                  |                                                                                                                                     |
| reflns collected                               | 33958                                                                                                                                 | 36569                                                                                                                                 |                                                                                                                                     |
| Independent reflns                             | 12051                                                                                                                                 | 13485                                                                                                                                 |                                                                                                                                     |
| $\theta$ range (deg)                           | 1.25 – 24.96                                                                                                                          | 1.25 – 26.00                                                                                                                          |                                                                                                                                     |
| GOF on <i>F</i> <sup>2</sup>                   | 1.029                                                                                                                                 | 1.034                                                                                                                                 |                                                                                                                                     |
| <i>R</i> <sub>int</sub>                        | 0.0661                                                                                                                                | 0.0431                                                                                                                                |                                                                                                                                     |
| <i>R</i> <sub>1</sub> <sup>a</sup>             | 0.0557                                                                                                                                | 0.0491                                                                                                                                |                                                                                                                                     |
| <i>wR</i> <sub>2</sub> (all data) <sup>b</sup> | 0.1786                                                                                                                                | 0.1543                                                                                                                                |                                                                                                                                     |

$${}^a R_1 = \frac{\sum ||F_o| - |F_c||}{\sum |F_o|}, \quad {}^b wR_2 = \frac{|\sum w(|F_o|^2 - |F_c|^2)|}{\sum w(F_o^2)^2}^{1/2}.$$

**Table S2** The selected bond lengths for compounds **IFMC-21** to **25**

| <b>IFMC-21</b> |          |              |          |
|----------------|----------|--------------|----------|
| N(1)-Zn(1)     | 2.122(6) | N(7)-Zn(1)   | 2.151(6) |
| N(3)-Zn(1)     | 2.097(6) | N(9)-Zn(1)   | 2.287(6) |
| N(5)-Zn(1)     | 2.076(6) | N(10)-Zn(1)  | 2.285(6) |
| Eu(1)-O(6)     | 2.358(6) | Eu(1)-O(1w)  | 2.465(5) |
| Eu(1)-O(5)     | 2.353(6) | Eu(1)-O(2)   | 2.521(6) |
| Eu(1)-O(8)     | 2.377(5) | Eu(1)-O(2w)  | 2.638(8) |
| Eu(1)-O(1)     | 2.418(6) | Eu(1)-O(8)#3 | 2.694(5) |
| Eu(1)-O(7)     | 2.422(5) |              |          |
| <b>IFMC-22</b> |          |              |          |
| N(1)-Zn(1)     | 2.069(6) | N(7)-Zn(1)   | 2.093(6) |
| N(3)-Zn(1)     | 2.157(6) | N(9)-Zn(1)   | 2.286(6) |
| N(5)-Zn(1)     | 2.099(6) | N(10)-Zn(1)  | 2.289(6) |
| O(1)-Ln(1)     | 2.363(5) | O(4)-Ln(1)   | 2.352(5) |
| O(2)-Ln(1)     | 2.349(6) | O(4)-Ln(1)#1 | 2.730(5) |
| O(1W)-Ln(1)    | 2.483(6) | O(5)-Ln(1)   | 2.537(6) |
| O(3)-Ln(1)     | 2.416(5) | O(6)-Ln(1)   | 2.430(6) |
| O(2W)-Ln(1)    | 2.582(6) |              |          |
| <b>IFMC-23</b> |          |              |          |
| N(1)-Zn(1)     | 2.082(5) | N(7)-Zn(1)   | 2.113(5) |
| N(3)-Zn(1)     | 2.156(5) | N(9)-Zn(1)   | 2.286(5) |
| N(5)-Zn(1)     | 2.089(5) | N(10)-Zn(1)  | 2.287(4) |
| O(1)-Ln(1)     | 2.338(5) | O(2W)-Ln(1)  | 2.637(6) |
| O(2)-Ln(1)#3   | 2.350(4) | O(4)-Ln(1)   | 2.410(4) |
| O(1W)-Ln(1)    | 2.455(4) | O(7)-Ln(1)   | 2.399(5) |
| O(3)-Ln(1)#3   | 2.350(4) | O(8)-Ln(1)   | 2.514(4) |
| O(3)-Ln(1)     | 2.698(4) |              |          |
| <b>IFMC-24</b> |          |              |          |
| N(1)-Zn(1)     | 2.084(6) | N(7)-Zn(1)   | 2.107(7) |
| N(3)-Zn(1)     | 2.155(7) | N(9)-Zn(1)   | 2.282(6) |
| N(5)-Zn(1)     | 2.114(7) | N(10)-Zn(1)  | 2.285(6) |
| O(1)-Ln(1)     | 2.314(7) | O(4)-Ln(1)#1 | 2.711(6) |
| O(2)-Ln(1)     | 2.344(6) | O(2W)-Ln(1)  | 2.455(6) |
| O(1W)-Ln(1)    | 2.604(9) | O(5)-Ln(1)   | 2.402(7) |
| O(3)-Ln(1)#3   | 2.392(6) | O(6)-Ln(1)   | 2.507(6) |
| O(4)-Ln(1)     | 2.334(6) |              |          |

---

**IFMC-25**

---

|              |          |              |          |
|--------------|----------|--------------|----------|
| N(1)-Zn(1)   | 2.078(5) | N(7)-Zn(1)   | 2.090(5) |
| N(3)-Zn(1)   | 2.154(5) | N(9)-Zn(1)   | 2.286(5) |
| N(5)-Zn(1)   | 2.122(5) | N(10)-Zn(1)  | 2.282(4) |
| O(1)-Tb(1)   | 2.319(5) | O(4)-Tb(1)   | 2.342(4) |
| O(2)-Tb(1)#4 | 2.325(5) | O(4)-Tb(1)#4 | 2.671(4) |
| O(1W)-Tb(1)  | 2.429(5) | O(5)-Tb(1)#3 | 2.495(4) |
| O(3)-Tb(1)#2 | 2.383(4) | O(6)-Tb(1)#3 | 2.377(4) |
| O(2W)-Tb(1)  | 2.676(9) |              |          |

---

Symmetry transformations used to generate equivalent atoms: for **IFMC-21**: #3  $-x+3,-y,-z+1$ ; for **IFMC-22**: #1  $-x+1,-y-1,-z$ ; for **IFMC-23**: #3  $-x,-y,-z+2$ ; for **IFMC-24**: #1  $-x+1,-y+1,-z+1$ ; #3  $-x+1,-y,-z+1$ ; for **IFMC-25**: #2  $x,y-1,z$ ; #3  $-x,-y+1,-z$ ; #4  $-x+1,-y+1,-z$ .

**Table S3** The angles between the benzimidazole rings and the benzene rings

| Compounds      | Three atoms | Angle/° | Two planes | Dihedral angle/° |
|----------------|-------------|---------|------------|------------------|
| <b>IFMC-21</b> | N2-C8-C9    | 110.123 | AB         | 88.727           |
|                | N4-C23-C24  | 111.306 | CD         | 85.800           |
|                | N6-C38-C39  | 110.533 | EF         | 87.331           |
|                | N8-C53-C54  | 112.769 | GH         | 88.164           |
| <b>IFMC-22</b> | N2-C8-C9    | 110.300 | AB         | 88.863           |
|                | N4-C23-C24  | 111.582 | CD         | 87.763           |
|                | N6-C38-C39  | 111.176 | EF         | 87.229           |
|                | N8-C53-C54  | 112.238 | GH         | 85.272           |
| <b>IFMC-23</b> | N2-C8-C9    | 110.629 | AB         | 87.874           |
|                | N4-C23-C24  | 111.617 | CD         | 88.566           |
|                | N6-C38-C39  | 111.329 | EF         | 84.614           |
|                | N8-C53-C54  | 109.697 | GH         | 88.554           |
| <b>IFMC-24</b> | N2-C8-C9    | 109.456 | AB         | 87.683           |
|                | N4-C23-C24  | 112.798 | CD         | 88.189           |
|                | N6-C38-C39  | 109.795 | EF         | 88.782           |
|                | N8-C53-C54  | 111.867 | GH         | 84.785           |
| <b>IFMC-25</b> | N2-C8-C9    | 110.658 | AB         | 87.544           |
|                | N4-C23-C24  | 113.009 | CD         | 88.916           |
|                | N6-C38-C39  | 110.822 | EF         | 88.942           |
|                | N8-C53-C54  | 112.091 | GH         | 84.833           |

---
